# Supplementary material for: Host range, transmissibility and antigenicity of a pangolin coronavirus
Source: PubMed Central journal article supplement (PMC10522490; doi:10.1038/s41564-023-01476-x), 2023-09-25
Supplement: 41564_2023_1476_MOESM1_ESM.pdf [file 41564_2023_1476_MOESM1_ESM.pdf]

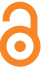

---

# Host range, transmissibility and antigenicity of a pangolin coronavirus

---

In the format provided by the authors and unedited

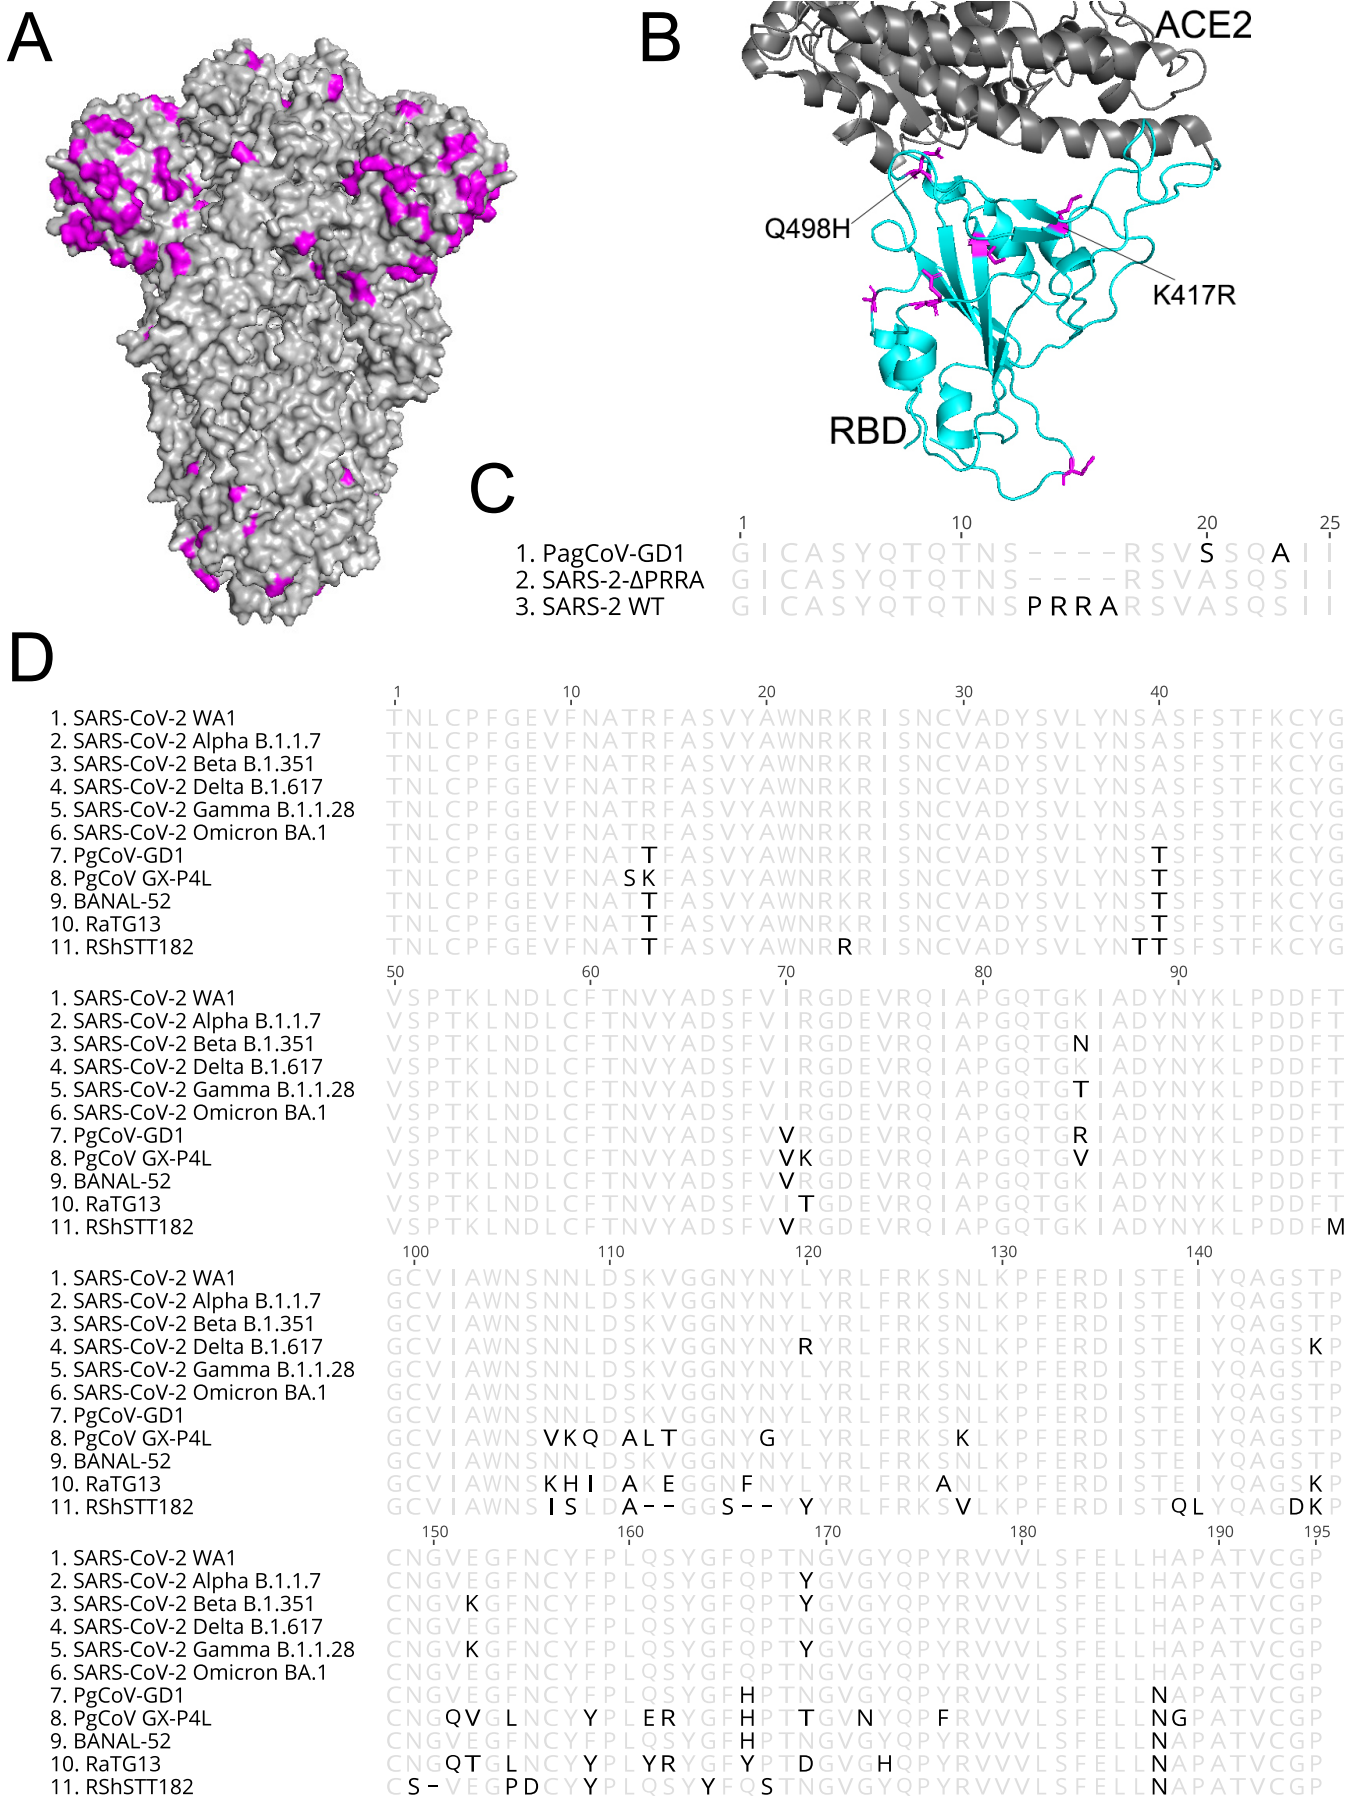

**Supplementary Figure 1. PgCoV Spike Variation.** Panel A. Annotation of amino acid variations (magenta) between PgCoV and SARS-CoV-2 in the spike trimer (PDB ID: 6vsb); Panel B. six amino acid variations (magenta) within the RBD (cyan), comparing to SARS-CoV-2. The two substitutions located in the ACE2 (grey) binding interfaces are Q498H and K417R. (PDB ID: 6vw1) Panel C. Alignments of amino acids around S1/S2 junctions between PgCoV, SARS-2 WT, and SARS-2 $\Delta$ PRRA. Panel D. Alignment of RBD between SARS-CoV-2 WA1 strain, variants of concerns, PgCoV strains, and several closely related bat Sarbecoviruses. The PgCoV RBD spans residues 327-520 while the S1/S2 furin cleavage site ( $\Delta$ PRRA) would have resided between residues S681 and R682, when comparing full length PgCoV and SARS-CoV-2 spike sequences.

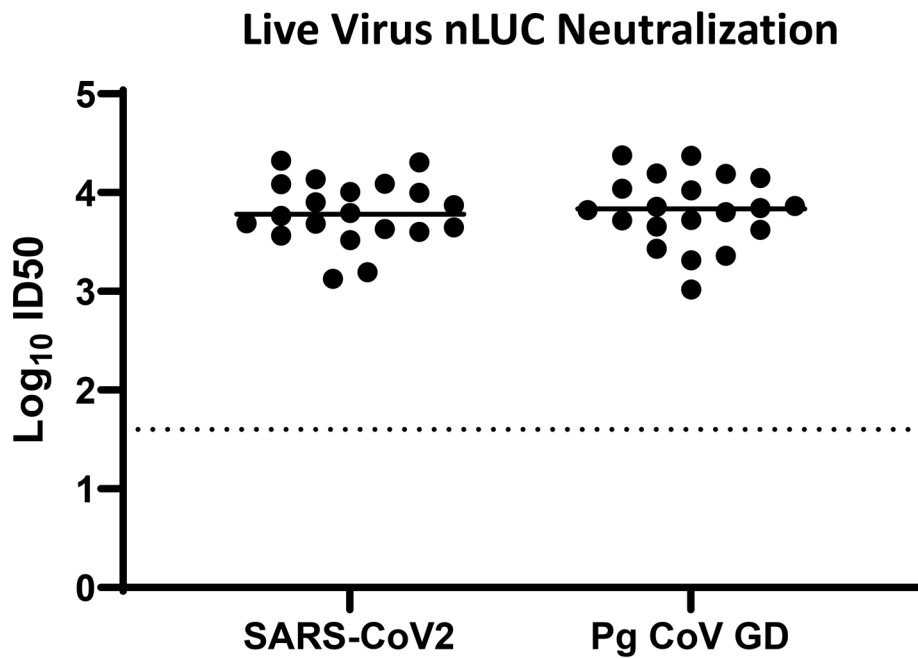

**Supplementary Figure 2. Recombinant S2P + Alum Neutralization Antibody Titers.** Mice (n=20) were primed and boosted with SARS-CoV-2 S2P + alum. Prior to challenge, serum was collected and evaluated for neutralization using SARS-CoV-2 D614G and PgCoV GD nLUC viruses and reported as Log<sub>10</sub> LD<sub>50</sub>. Data are presented as mean values ± SD.

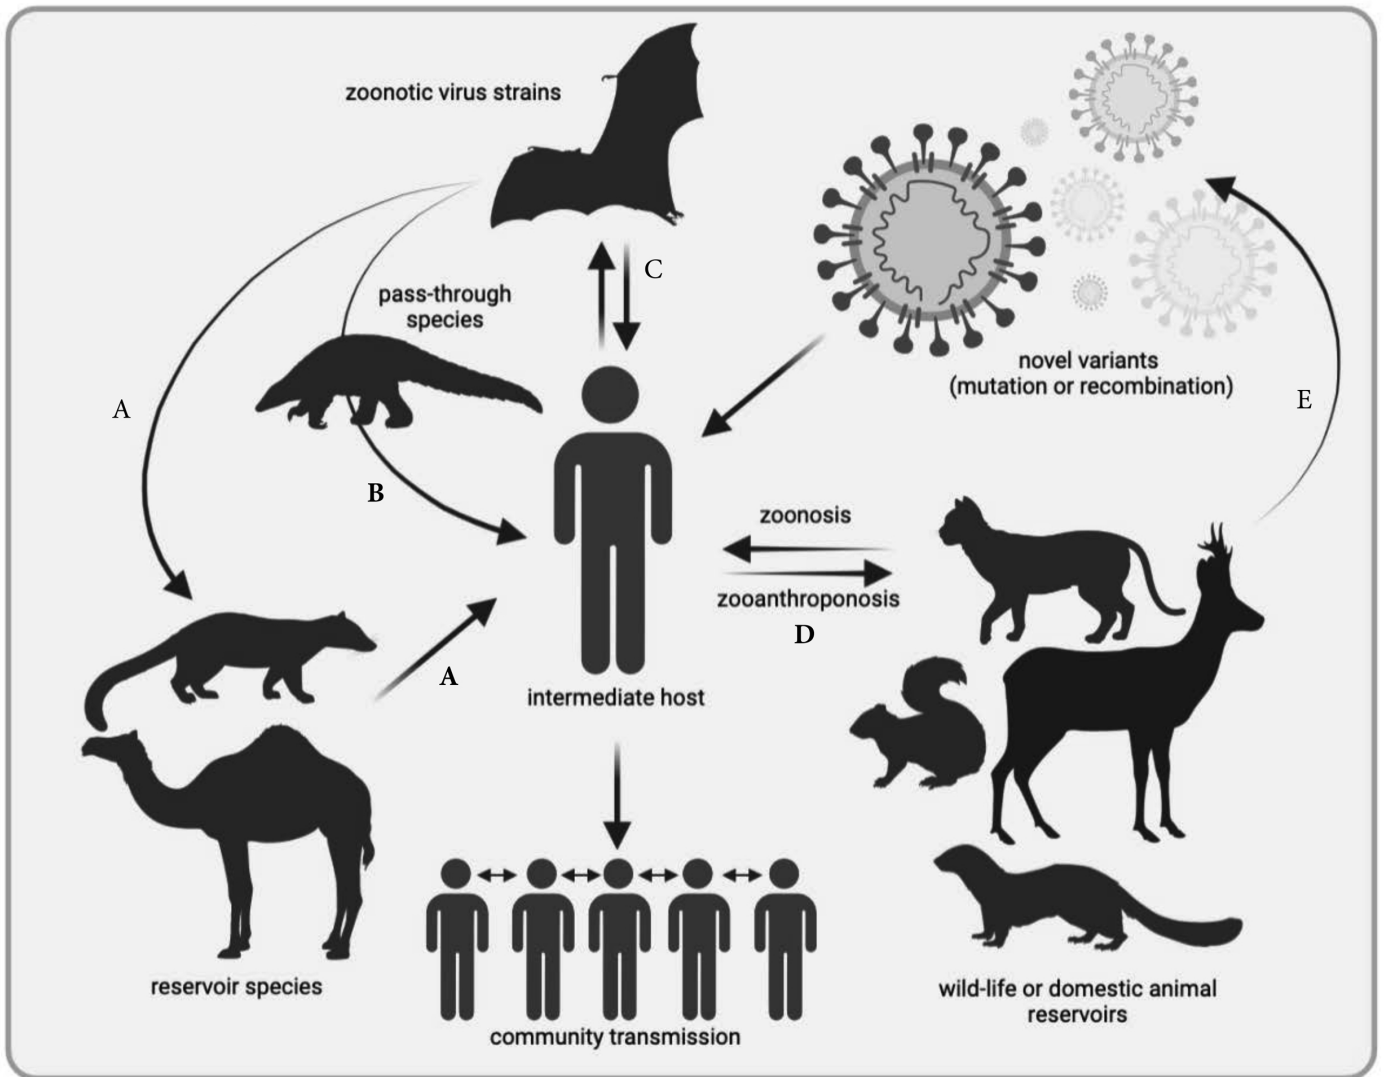

**Supplementary Figure 3. Models for Emerging Coronavirus Cross Species Transmission.** The classic model for coronavirus emergence involves transmission of zoonotic virus strains that circulate broadly and evolve in an intermediate reservoir species before spreading to human hosts (A). However, alternative pathways for zoonotic virus introductions include rare pass through species that are rare but are in close proximity and can directly transmit to human hosts (B) or via direct introduction into humans from bats (C). By zooanthroponosis (D), human hosts also function as intermediate hosts for the transmission and maintenance of virus in other species, which can drive novel evolutionary trajectories and potentially reintroduce virus variants into human hosts (E).

**Supplementary Table 1. Lung Pathology\* and IHC Score# of hamsters infected by PgCoV.**

| Sample ID    | Perivascular inflammation | Bronchial/bronchiolar epithelial degeneration/necrosis | Bronchial/bronchiolar inflammation | Alveolar inflammation | Total Pathology Score (H&E) | IHC score |
|--------------|---------------------------|--------------------------------------------------------|------------------------------------|-----------------------|-----------------------------|-----------|
| PgCoV Lung 1 | 1                         | 1                                                      | 2                                  | 2                     | 6                           | 2         |
| PgCoV Lung 2 | 1                         | 1                                                      | 1                                  | 1                     | 4                           | 1         |
| PgCoV Lung 3 | 0                         | 1                                                      | 1                                  | 3                     | 5                           | 2         |
| PgCoV Lung 4 | 1                         | 0                                                      | 1                                  | 1                     | 3                           | 0         |
| PgCoV Lung 5 | 1                         | 1                                                      | 1                                  | 1                     | 4                           | 1         |
| PgCoV Lung 6 | 2                         | 1                                                      | 1                                  | 2                     | 6                           | 2         |

- \*A 5-point scoring system was utilized (0-within normal limits, 1-mild, 2-moderate, 3-marked, 4-severe) in H&E sections.
- #A 4-point scoring system was utilized (0- none, 1-minimal, 2-moderate, 3-abundant signals) in IHC sections.
- A total pathology score was calculated for each hamster by adding the individual histopathological feature scores.
- A maximum total pathology score of 16 is possible for an individual hamster. At 4DPI, all hamsters exhibited typical microscopic lesions of broncho-interstitial pneumonia.
- Individual pathology scores varied from 3/16 to 6/16 and were determined in collaboration with a certified pathologist at Histowiz ([www.histowiz.com](http://www.histowiz.com)).

**Supplementary table 2. IC<sub>50</sub> values of A panel of SARS-CoV-2 antibodies cross neutralization against PgCoV and SARS-CoV-2**

| SARS-2 Abs | Binding domain    | IC <sub>50</sub> (µg/mL) |             |
|------------|-------------------|--------------------------|-------------|
|            |                   | Anti-PgCoV               | Anti-SARS-2 |
| 4A8        | NTD               | >30                      | 0.027       |
| COV2-2489  | NTD               | >10                      | 0.5469      |
| COV2-2676  | NTD               | >10                      | 0.4678      |
| COV2-2164  | S2                | >10                      | >10         |
| B38        | RBD (Class I)     | 0.94                     | 7.15        |
| S309       | RBD (Class III)   | 0.138                    | 0.143       |
| LY-COV016  | RBD (Class I)     | 0.086                    | 0.126       |
| REGN10933  | RBD (Class I)     | 0.108                    | 0.023       |
| REGN10987  | RBD (Class III)   | 0.062                    | 0.0097      |
| LY-COV555  | RBD (Class I/III) | 0.0091                   | 0.042       |
| ADG-2      | RBD (Class I)     | 0.00335                  | 0.04489     |
| ADG-1      | RBD               | 0.0285                   | 0.045       |
| ADG-3      | RBD               | 0.0136                   | 0.1053      |
| COV2-2196  | RBD (Class I/II)  | 0.1444                   | 0.0558      |
| COV2-2130  | RBD (Class III)   | >10                      | 0.1905      |
| COV2-2479  | RBD (Class II)    | 0.06513                  | 0.06313     |
| COV2-2499  | RBD (Class III)   | 1.429                    | 0.07356     |
| COV2-2832  | RBD (Class II)    | 0.0383                   | 0.02279     |
| COV2-2082  | RBD (Class I)     | 0.041                    | 0.05002     |
