# Supplementary material for: Host range, transmissibility and antigenicity of a pangolin coronavirus
Source: PubMed Central journal article supplement (PMC10522490; doi:10.1038/s41564-023-01476-x), 2023-09-25

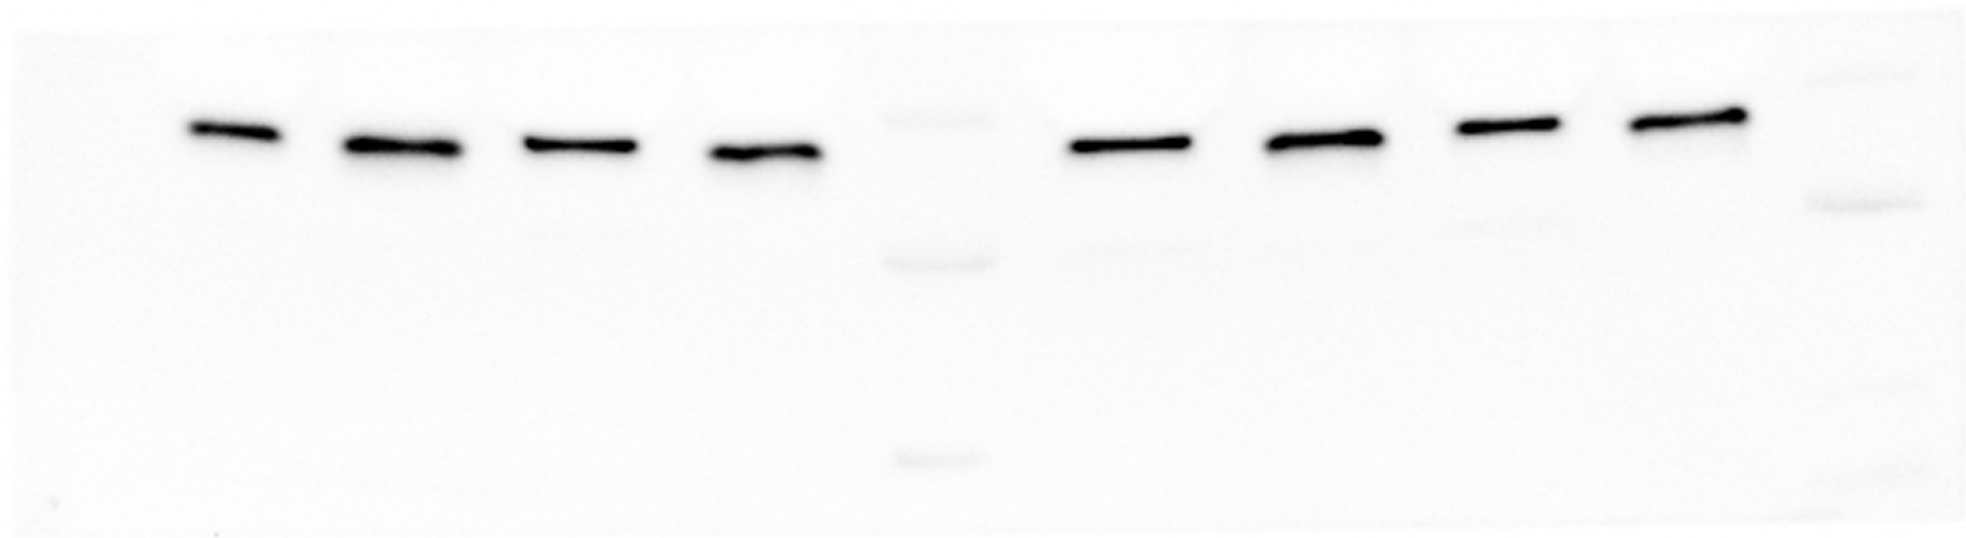

Supplement: 41564_2023_1476_MOESM3_ESM.pdf [file 41564_2023_1476_MOESM3_ESM.pdf]
